# Supplementary material for: Neutrophils incite and macrophages avert electrical storm after myocardial infarction
Source: PubMed Central journal article supplement (PMC9410341; doi:10.1038/s44161-022-00094-w), 2022-07-11
Supplement: NIHMS1827933-supplement-Supplementary_Table_1.pdf [file NIHMS1827933-supplement-Supplementary_Table_1.pdf]

## Supplementary Table 1

| Rank | Gene name | Full name                                                                          | Fold change |
|------|-----------|------------------------------------------------------------------------------------|-------------|
| 1    | Retnlg    | resistin like gamma                                                                | 4.11        |
| 2    | S100a9    | S100 calcium binding protein A9                                                    | 4.03        |
| 3    | Lcn2      | lipocalin 2                                                                        | 3.92        |
| 4    | S100a8    | S100 calcium binding protein A8                                                    | 3.73        |
| 5    | Hdc       | histidine decarboxylase                                                            | 3.21        |
| 6    | Acod1     | aconitate decarboxylase 1                                                          | 3.17        |
| 7    | Ngp       | neutrophilic granule protein                                                       | 2.94        |
| 8    | G0s2      | G0/G1 switch gene 2                                                                | 2.94        |
| 9    | Ccl3      | chemokine (C-C motif) ligand 3                                                     | 2.86        |
| 10   | Hcar2     | hydroxycarboxylic acid receptor 2                                                  | 2.83        |
| 11   | Il1r2     | interleukin 1 receptor, type II                                                    | 2.77        |
| 12   | Mxd1      | MAX dimerization protein 1                                                         | 2.64        |
| 13   | Sfn4      | schlafen 2                                                                         | 2.58        |
| 14   | Egr1      | early growth response 1                                                            | 2.47        |
| 15   | Cxcl2     | chemokine (C-X-C motif) ligand 2                                                   | 2.46        |
| 16   | Fpr1      | formyl peptide receptor 1                                                          | 2.39        |
| 17   | Gadd45a   | growth arrest and DNA-damage-inducible 45 alpha                                    | 2.37        |
| 18   | Samsn1    | SAM domain, SH3 domain and nuclear localization signals, 1 Symbol;Acc:MGI:1914992] | 2.37        |
| 19   | Nlrp3     | NLR family, pyrin domain containing 3                                              | 2.36        |
| 20   | Ifitm1    | interferon induced transmembrane protein 1                                         | 2.33        |
| 21   | Cxcr2     | chemokine (C-X-C motif) receptor 2                                                 | 2.31        |
| 22   | Wfdc21    | WD repeat domain 31                                                                | 2.28        |
| 23   | Cd24a     | CD24a antigen                                                                      | 2.27        |
| 24   | Trem1     | TNF receptor-associated factor 1                                                   | 2.22        |
| 25   | Ccr12     | chemokine (C-C motif) receptor-like 2                                              | 2.22        |
| 26   | Il1rn     | interleukin 1 receptor antagonist                                                  | 2.18        |
| 27   | Csf1      | colony stimulating factor 1 (macrophage)                                           | 2.17        |
| 28   | Pnrc1     | proline-rich nuclear receptor coactivator 1                                        | 2.11        |
| 29   | Fpr2      | formyl peptide receptor 2                                                          | 2.10        |
| 30   | Clec4e    | C-type lectin domain family 4, member e                                            | 2.10        |
| 31   | Lmnb1     | lamin B1                                                                           | 2.10        |
| 32   | Chil1     | chitinase-like 1                                                                   | 2.09        |
| 33   | Nfkbiz    | nuclear factor of kappa light polypeptide gene enhancer in B cells inhibitor, zeta | 2.09        |
| 34   | Slpi      | sarcolemma associated protein, opposite strand transcript 2                        | 2.07        |
| 35   | Cxcl3     | chemokine (C-X-C motif) ligand 3                                                   | 2.04        |
| 36   | Dmxl2     | Dmx-like 2                                                                         | 2.04        |
| 37   | Asprv1    | aspartic peptidase, retroviral-like 1                                              | 2.02        |
| 38   | Il1f9     | interleukin 1 family, member 9                                                     | 1.92        |
| 39   | Cd300lf   | CD300 molecule like family member F                                                | 1.88        |
| 40   | Mmp8      | matrix metalloproteinase 8                                                         | 1.88        |
| 41   | Il1b      | interleukin 1 beta                                                                 | 1.88        |
| 42   | Ets2      | E26 avian leukemia oncogene 2, 3' domain                                           | 1.87        |
| 43   | Tnfaip2   | tumor necrosis factor                                                              | 1.87        |
| 44   | Tnfaip3   | tumor necrosis factor, alpha-induced protein 2                                     | 1.85        |
| 45   | Btg2      | BTG anti-proliferation factor 2                                                    | 1.84        |
| 46   | Marcksl1  | MARCKS-like 1                                                                      | 1.83        |
| 47   | Il1a      | interleukin 1 alpha                                                                | 1.81        |
| 48   | Clec4d    | C-type lectin domain family 4, member d                                            | 1.81        |
| 49   | Cd33      | CD33 antigen                                                                       | 1.81        |
| 50   | Srgn      | steroid receptor RNA activator 1                                                   | 1.73        |
